# Supplementary material for: Comparative Studies of Structural and Physicochemical Properties of the First Fullerene Derivative FD‐C60 (Fullerenol) and the Second Fullerene Derivate SD‐C60 (3HFWC)
Source: Preprints.org preprint supplement (doi:10.20944/preprints202312.2331.v1), 2023-12-29
Supplement: Supplementary file 1 [file supplementary]

Supplementary Material

Comparative studies of structural and physicochemical properties of the first fullerene derivative FD-C60 (fullerenol) and the second fullerene derivate SD-C60 (3HFWC)

Djuro Koruga 1,7*, Ivana Stanković1, Lidija Matija1, Dietmar Kuhn 2, Bastian Christ3,Sofia Dembski3,Nenad Jevtic4, Jelena Janać4, Vladimir Pavlović5, Bart De Wever6

1 NanoLab, Department of Biomedical Engineering, Faculty of Mechanical Engineering, University of Belgrade, Belgrade, Serbia; [lmatija@mas.bg.ac.rs](mailto:lmatija@mas.bg.ac.rs) (L.M.) [imileusnic@mas.bg.ac.rs](mailto:imileusnic@mas.bg.ac.rs) (I.S.), dkoruga@mas.bg.ac.rs (Dj.K)

2 LAUS GmbH, Kirrweiler, Germany; [dietmar.kuhn@laus.group](mailto:dietmar.kuhn@laus.group) (D.K.)

3 Fraunhofer , Institute for Silicate Research ISR, WürzburgGermany, [bastian.christ@isc.fraunhofer.de](mailto:bastian.christ@isc.fraunhofer.de) (B.C.) [sofia.dembski@isc.fraunhofer.de](mailto:sofia.dembski@isc.fraunhofer.de) (S.D.)

4 TFT Nano Centre, Belgrade, Serbia, [nenad.jeftic@tftnanocenter.rs](mailto:nenad.jeftic@tftnanocenter.rs) (N.J.), [jelena.janac@tftnanocenter.rs](mailto:jelena.janac@tftnanocenter.rs) (J.J.)

5 TEM Laboratory, Faculty of Agriculture, University of Belgrade, Serbia, [vlaver@agrif.bg.ac.rs](mailto:vlaver@agrif.bg.ac.rs) (V.P)

6 Altexa Development, Monaco, [bartaltexa@gmail.com](mailto:bartaltexa@gmail.com) (B.W.)

7 NanoWorld, Belgrade, Serbia [djuro.koruga@gmail.com](mailto:djuro.koruga@gmail.com) (Dj.K.)

•Correspondence: [dkoruga@mas.bg.ac.rs](mailto:dkoruga@mas.bg.ac.rs) or/and [djuro.koruga@gmail.com](mailto:djuro.koruga@gmail.com) (Dj.K.)

**(S1) Supplement Table 1:** Icosahedral symmetry group that determines the energy states (T1g, T2g, T1u and T2u) of structures and processes. Fibonacci numbers Φ, -Φ, φ, -φ are subset of icosahedral symmetry group ( ± ½(1+and ± ½(1-)) (Adapt from Kettle, S.F.A., Symmetry and structure, John Willey and Sons, Chichester, 1995).

**
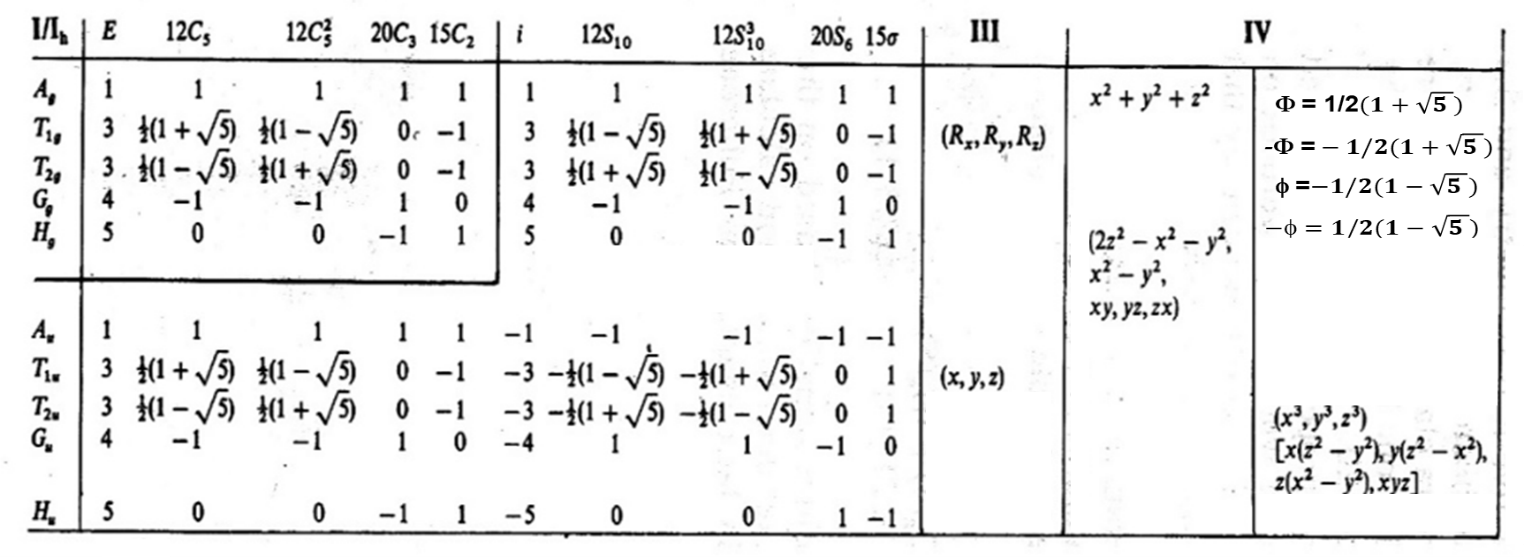
**

**(S2) Supplement Table 2:** Characterisation of dry 3HFWC in five independent institutions. SD-C60 (3HFWC) is produced as solution and dryed just before experiment. This information tell us how long soft-solid state of substance was stable (“old”) in solution (TFT – TFT Nano Centre, NW – NanoWorld).

| No. | **SD-C60 (3HFWC) solution produced**  **(NW/TFT)** | **SD-C60 (3HFWC)**  **Dry**  **(experiment done)** | **SD-C60 (3HFWC)**  **Old**  **(standing in solution)** | **Institution where experiment is done** |
| --- | --- | --- | --- | --- |
| 1. | April 2018 (TFT) | October 17, 2018. | 6 months | Center for Electron Microscopy at the Faculty of Biology, University of Belgrade |
| 2. | March 2015 (NW) | June 20, 2019. | 4 yr. 3 months | TEM Laboratory Faculty of Agriculture, University of Belgrade |
| May 2018 (TFT) | 1 yr.1 month |
| 3. | April 2022 (TFT) | February 24, 2023 | 8 months |
| 4. | October 2021 (TFT) | March 20, 2023 | 1yr. 5 months | LAUS GmbH, Germany |
| 5. | April 2022 (TFT) | March 25, 2023 | 8 months | NanoLab, Faculty of Mechanical Engineering, University of Belgrade |
| 6. | October 2021(TFT) | April,28,2023 | 1yr. 6 months | Fraunhofer-Insitut für Silicatforschung ISC, Germany |

**(S3) Supplement Figure 1:** Fullerenol 13C-NMR spectra and OH groups determination (orginal image from device print)


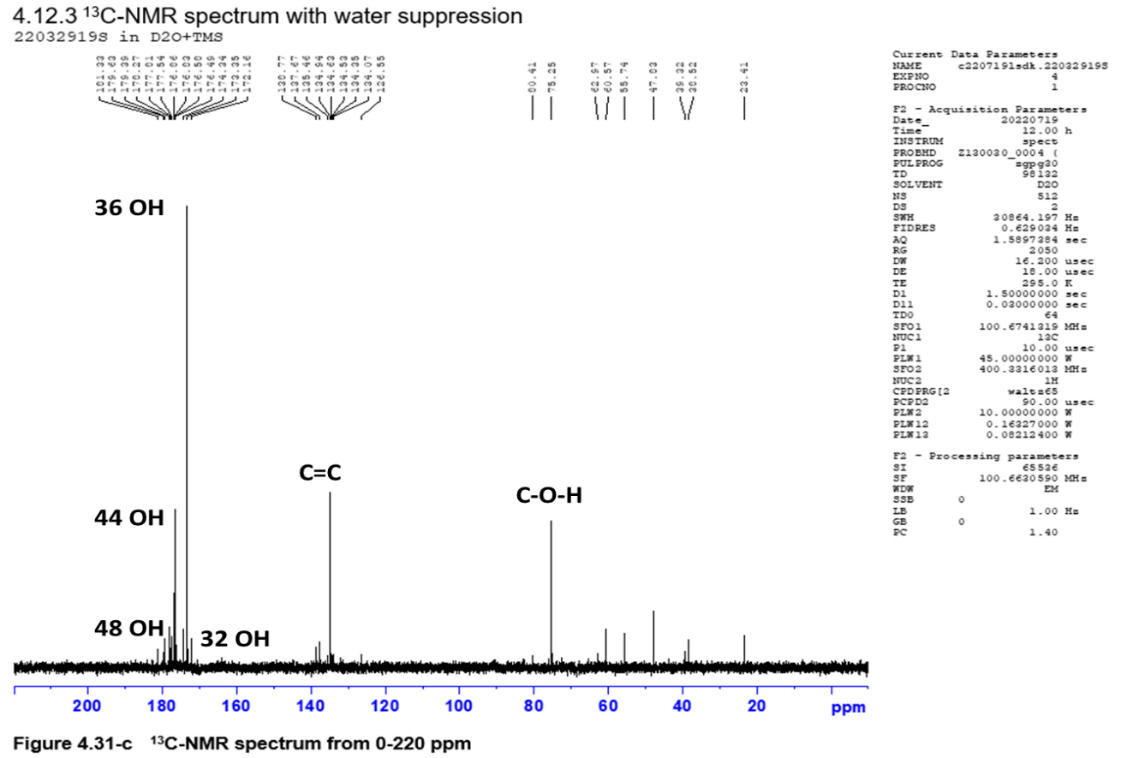


**Suppl. Figure 1 (S2) :** Fullerenol 100% - powder, thirteen peaks from 172 to 181 ppm shows different forms of fullerenol (from 30 to 50 OH groups) with dominant peak at 176.49 ppm (36 OH group). The second peaks from 126-138 ppm showed C=C in C60, while peaks 80.41 ppm represent C- OH group in hydroxylated fullerene. Average percentages (%) of OH groups number are: 32 is ~3%, 36 is ~68%, 44 is ~22%, 48 is ~5% and others ~2%. In the paper 36 OH group is considered as average number.

**(S4) Supplement Figure 2**: Structure order of fullerenol and 3HFWC


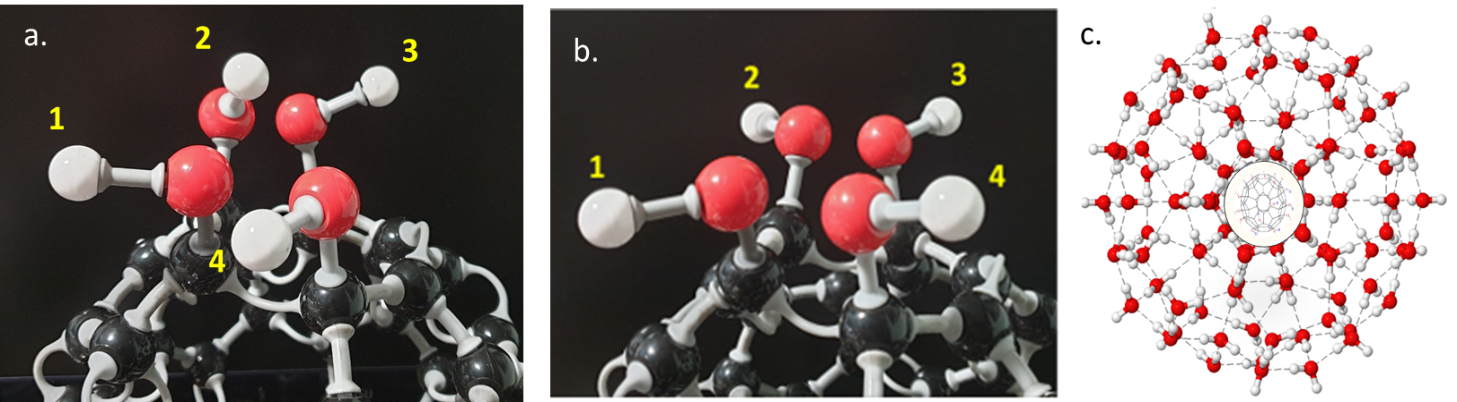


**Suppl. Figure 2(S4).** Dilema about order of SD-C60 (3HFWC) using two different methods 1H-NMR and XRD. The results of 1H-NMR gave a better arrangement of the structure in SD-C60 (3HFWC) than in FD-C60 (fullerenol), while the situation with XRD results is the opposite. In order to distinguish between them , we should bear in mind that we used the 1H-NMR technique to identify the positions of hydrogen (protons), while we used the XRD technique to identify the arrangement of the structure in crystal lattices. As can be seen from the pictures (a. and b.), the position of the hydrogen atom (proton) can be different due to the possibility of rotation of the OH group which is connected to carbon. Thus, very different positions can occur for 36 OH groups, while in SD-C60 this is not the case, because all hydrogen atoms (protons) are fixed in three-dimensional Penros tiling (3DPT - The Penrose tiling pattern is a type of quasicrystal, which means that it has an ordered yet never-repeating structure), figure c. However, when viewed from the perspective of the XRD method, fullerenol is a molecular crystal with icosahedral symmetry, so its structure is well ordered. As 3DPT are aperiodic structures of the fullerene-water complex (SD-C60), its order is smaller than that of fullerenol.This is similar to the difference between the order of a classical crystal (diamante, crystal lattice clearly defined) and DNA (as aperiodic structures where pairs appear alternately A=T and C≡G). And precisely because SD-C60 is not a classically crystallographic ordered structure (the same crystal cell is repeated) but a structure with aperiodic repetition of 3D-Pernos tilings, it possesses special properties that we are only now begin to discover and investigate experimentally .

**(S5) Supplement Figure 3:** Water presence in fullerenol and 3HFWC


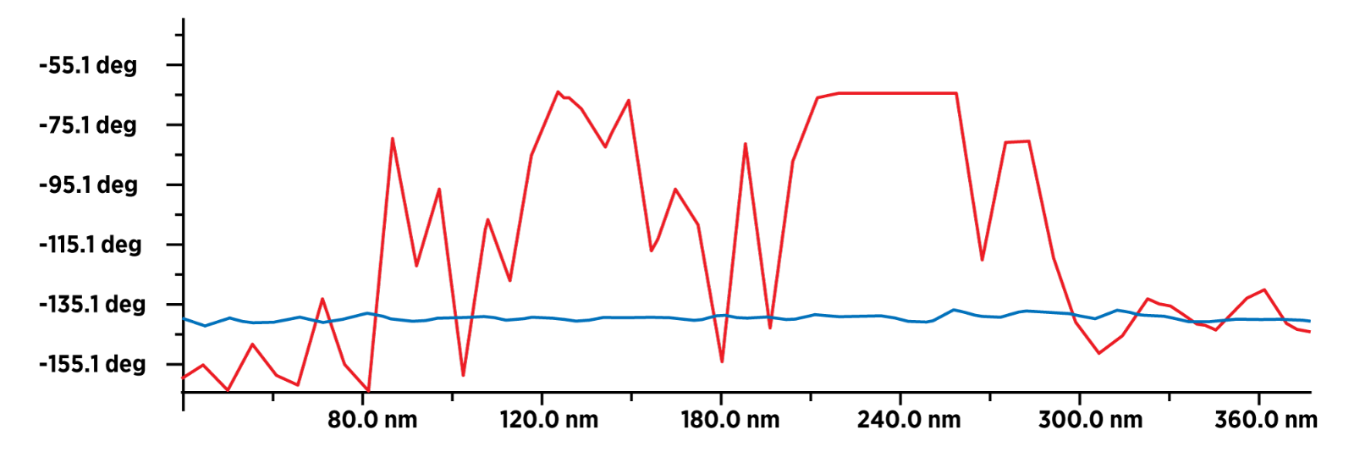


**Suppl. Figure 3 (S5).** Presence of water molecules in FD-C60 (humidity) and SD-C60 (humidity + water layers). This is comparative diagrams (from Figure 11 and 12, range 0-400 nm) of intensity values of dipole-dipole interactions between MFM magnetic tip and substrate (FD-C60 - blue line and SD-C60 - red line). FD-C60 has a low intensity of dipole-dipole interaction due to humidity, while SD-C60 has a high intensity of dipole-dipole interaction because, in addition to humidity, it contains water molecules packed in layers ,shells (3DPT: three-dimesional Penrose tilies) [22]

**(S6) Supplement Figure 4.** Zeta potential of fullerenol and 3HFWC


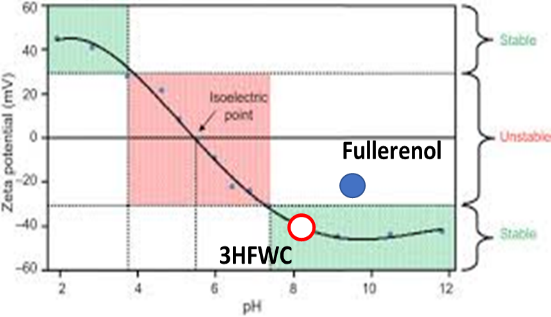

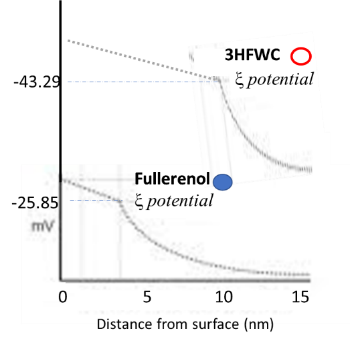

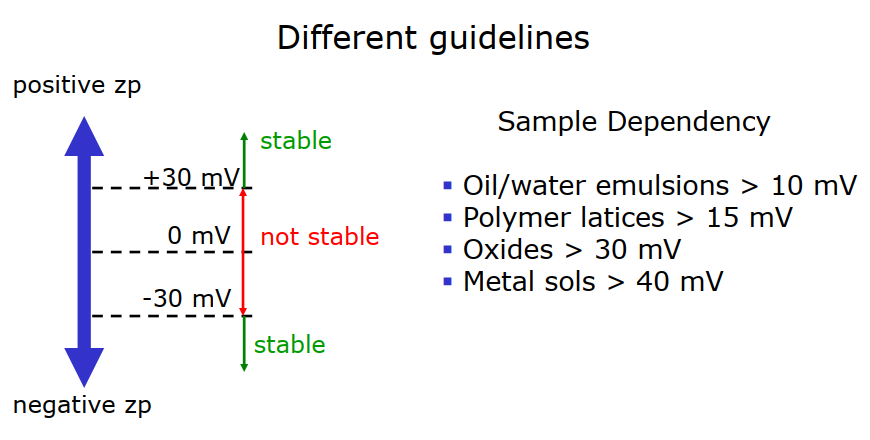


**Suppl. Figure 4(S6)** Zeta potential of fullerenol and 3HFWC. The figures show the comparative values of zeta potential for fullerenol (-25.85 mV) and 3HFWC (-43.29 mV), as a criterion of stability. It is observed that the 3HFWC substance has almost twice higher the value of the zeta potential then fullerenol, which also points to its greater stability. Also, if we compare the zeta potential of 3HFWC with metal sols, the value is approximately the same. This shows that water layers arranged as a three-dimensional Penrose tiling (3DPT) [22] have special physical properties that give the entire 3HFWC structure stability.

**(S7) Suppl. Figure 5:** NIR Spectra of 3HFWC for different temperatures.


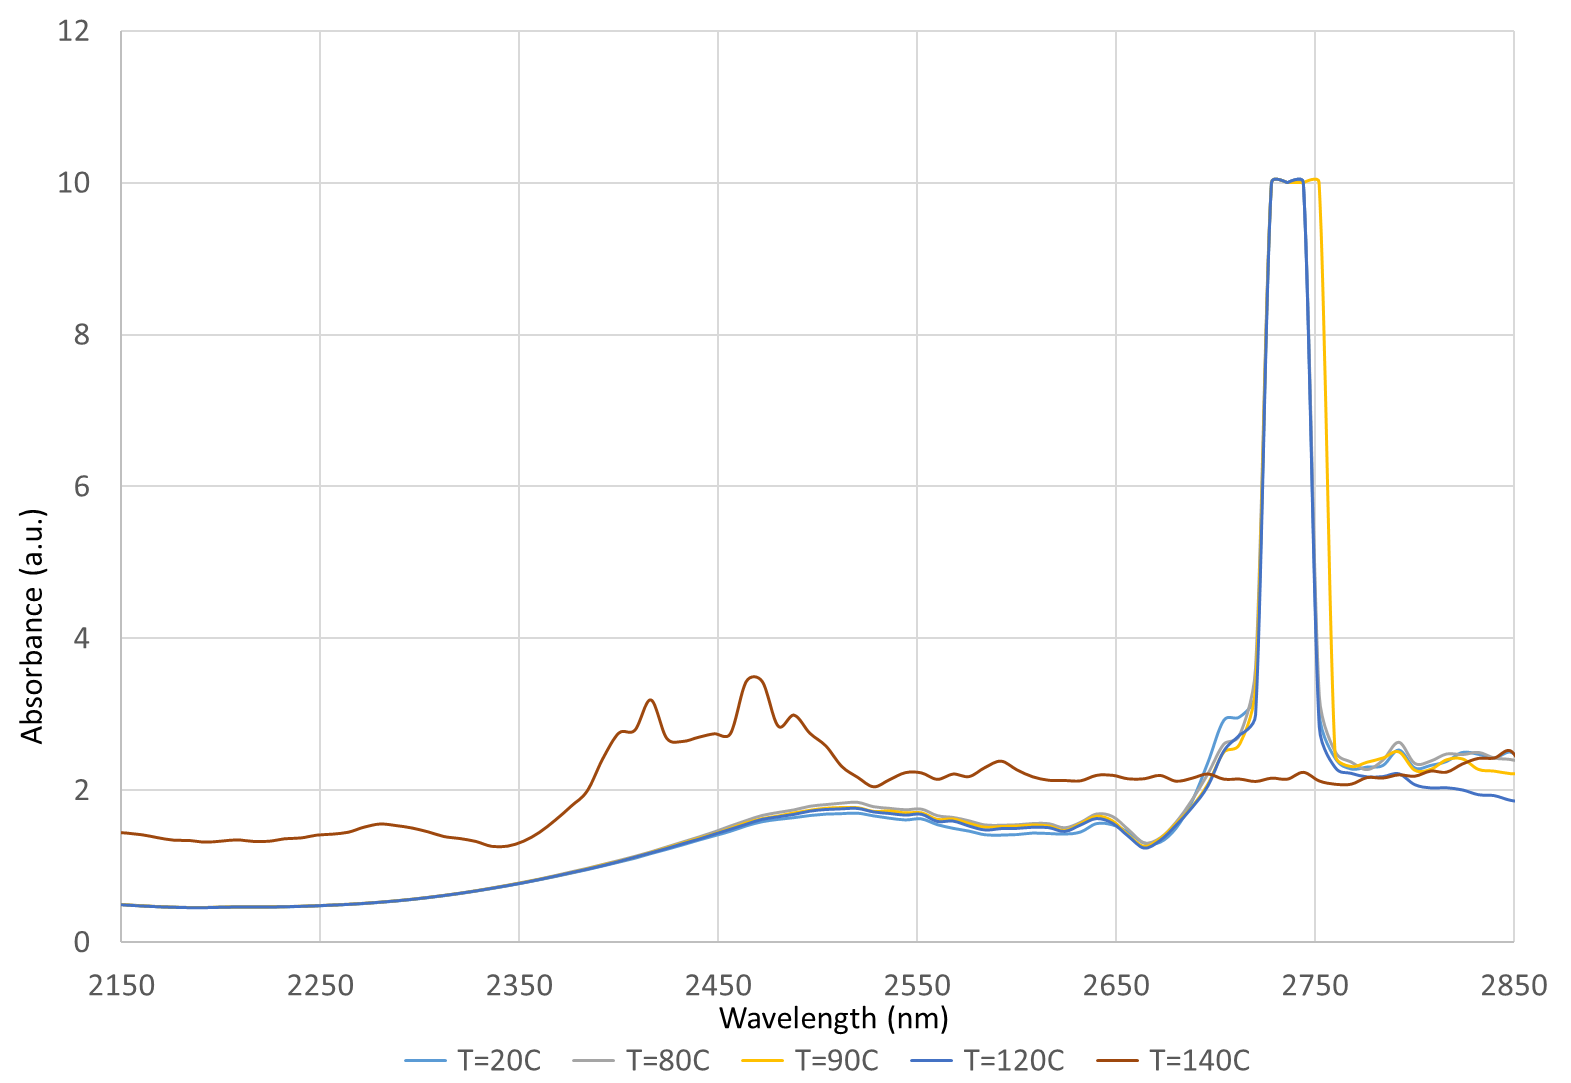


Suppl. Figure 5(S7). NIR spectra in the domain of hydrogen bonds of 3HFWC (SD-C60) solution with a concentration of 0.150 g/L for temperatures of 20°C , 80°C, 90°C, 120°C and 140°C. As can be seen from the diagram, in the domain of 2,150-2,850 nm, there are no significant differences in the spectrum from 20°C to 120°C, which means that the hydrogen bonds in the water layers of 3HFWC have not been destroyed or lost their intensity. However, for temperature 140°C spectra is different, particularly in domain from 2,700 to 2,800 nm, and it can be seen that the intensity of hydrogen bonds is small and that they are actually broken. At what temperature, between 120°C and 140°C, does evaporation occur? The answer to this question is given by the TGA/DTA experiment, peak at 132.9°C (133°C) with exothermic reaction (Figure 15). At 140°C, the structure of the water layers of SD-C60 not only breaks down into water molecules, but the water molecules break down into OH and H, as well as the OH group of fullerenol into O and H. Different structures are formed, resulting in combined vibrations of fragmental structures in the domain of 2,350-2,500 nm, which can be seen in the diagram (red line).
